# Supplementary material
Source: ML conference proceedings conference paper supplement (https://openreview.net/forum?id=t79rMQGk4S)
Supplement: supplementary_material [file bios_norm_cov.xlsx]

## Sheet: Sheet1
	norm_cov_x_z					norm_cov_x_y
p_y_z	0.5	0.6	0.7	0.8	0.9	0.5	0.6	0.7	0.8	0.9
layers
7	0.304252	0.325321	0.330657	0.325454	0.324133	0.116903	0.139292	0.184145	0.230737	0.279691
8	0.418981	0.442252	0.440466	0.42722	0.433695	0.109288	0.141212	0.211097	0.279601	0.361347
9	0.332122	0.340251	0.348358	0.348581	0.363595	0.0937179	0.118246	0.178886	0.237691	0.308708
10	0.338629	0.367541	0.355759	0.331316	0.344885	0.190804	0.251786	0.266034	0.26081	0.314143
11	1.06538	1.13801	1.10248	1.08504	1.01643	0.448473	0.595975	0.707925	0.886723	0.94444
12	1.36815	1.45054	1.46523	1.52141	1.80591	0.570475	0.72124	1.01605	1.36447	1.85411
