# Supplementary material
Source: ML conference proceedings conference paper supplement (https://openreview.net/forum?id=t79rMQGk4S)
Supplement: supplementary_material [file dama_mixed_pivot_appendix.xlsx]

## Sheet: Sheet1
coef_type	layer	orig	SAL	LEACE	opt-sep-proj	model
stereotype_coef	lm_head	3.594	0.801	0.85	0.791	Llama_2_7B
stereotype_coef	last_3	3.594	0.926	0.84	0.761	Llama_2_7B
stereotype_coef	last_5	3.594	0.844	0.837	0.773	Llama_2_7B
stereotype_coef	last_9	3.594	0.912	0.791	0.678	Llama_2_7B
fact_coef	lm_head	15.712	5.905	12.139	24.294	Llama_2_7B
fact_coef	last_3	15.712	3.079	12.856	37.084	Llama_2_7B
fact_coef	last_5	15.712	6.089	11.597	10.537	Llama_2_7B
fact_coef	last_9	15.712	3.894	27.631	113.038	Llama_2_7B
intercept	lm_head	2.187	3.588	3.362	3.242	Llama_2_7B
intercept	last_3	2.187	189.54	5.097	0.999	Llama_2_7B
intercept	last_5	2.187	112.151	5.635	1.783	Llama_2_7B
intercept	last_9	2.187	16650.2	32.081	111.103	Llama_2_7B
