# Supplementary material
Source: ML conference proceedings conference paper supplement (https://openreview.net/forum?id=t79rMQGk4S)
Supplement: supplementary_material [file dama_mixed_pivot_appendix_paper.xlsx]

## Sheet: Sheet1
0	4	8	12	13	14	15	16	17
Llama_2_7B	Llama_2_7B	Llama_2_7B	Llama_2_13B	Llama_2_13B	Llama_2_13B	Llama_3_8B	Llama_3_8B	Llama_3_8B
stereotype_coef	fact_coef	intercept	stereotype_coef	fact_coef	intercept	stereotype_coef	fact_coef	intercept
3.594	15.712	2.187	3.765	21.804	2.459	4.484	35.497	1.899
0.801	5.905	3.588	1.004	4.835	39.937	0.771	7.083	2.922
0.85	12.139	3.362	1.78	11.159	3.445	0.766	26.195	3.203
0.791	24.294	3.242	1.859	16.27	3.377	0.693	60.762	3.061
