# Supplementary material
Source: ML conference proceedings conference paper supplement (https://openreview.net/forum?id=t79rMQGk4S)
Supplement: supplementary_material [file dama_mixed_pivot_Llama_2_7B.xlsx]

## Sheet: Sheet1
model	coef_type	layer	orig	SAL	LEACE	opt-sep-proj
Llama_2_7B	stereotype_coef	lm_head	3.594	0.801	0.85	0.791
Llama_2_7B	stereotype_coef	last_3	3.594	1.138	1.045	0.997
Llama_2_7B	stereotype_coef	last_5	3.594	0.864	0.633	0.635
Llama_2_7B	stereotype_coef	last_9	3.594	1.181	0.895	0.87
Llama_2_7B	fact_coef	lm_head	15.712	5.904	12.131	24.272
Llama_2_7B	fact_coef	last_3	15.712	4.069	14.299	37.936
Llama_2_7B	fact_coef	last_5	15.712	5.294	14.351	15.093
Llama_2_7B	fact_coef	last_9	15.712	6.478	26.124	78.165
Llama_2_7B	intercept	lm_head	2.187	3.574	3.371	3.247
Llama_2_7B	intercept	last_3	2.187	24.838	8.527	7.317
Llama_2_7B	intercept	last_5	2.187	171.338	9.022	5.63
Llama_2_7B	intercept	last_9	2.187	66.541	33.42	181.401
