# Supplementary material
Source: ML conference proceedings conference paper supplement (https://openreview.net/forum?id=t79rMQGk4S)
Supplement: supplementary_material [file dama_mixed_pivot_Llama_2_13B.xlsx]

## Sheet: Sheet1
model	coef_type	layer	orig	SAL	LEACE	opt-sep-proj
Llama_2_13B	stereotype_coef	lm_head	3.837	0.844	0.878	0.812
Llama_2_13B	fact_coef	lm_head	20.205	4.807	16.318	33.244
Llama_2_13B	intercept	lm_head	2.486	41.352	3.949	3.835
