# Supplementary material
Source: ML conference proceedings conference paper supplement (https://openreview.net/forum?id=t79rMQGk4S)
Supplement: supplementary_material [file dama_mixed_pivot_Llama_3_8B.xlsx]

## Sheet: Sheet1
model	coef_type	layer	orig	SAL	LEACE	opt-sep-proj
Llama_3_8B	stereotype_coef	lm_head	4.484	0.771	0.766	0.693
Llama_3_8B	fact_coef	lm_head	35.497	7.083	26.195	60.762
Llama_3_8B	intercept	lm_head	1.899	2.922	3.203	3.061
