# Supplementary material
Source: ML conference proceedings conference paper supplement (https://openreview.net/forum?id=t79rMQGk4S)
Supplement: supplementary_material [file dama_mixed_pivot_paper.xlsx]

## Sheet: Sheet1
model	method	stereotype_coef	fact_coef	intercept
Llama_2_7B	orig	3.59	15.71	2.19
	SAL	0.8	5.9	3.57
	LEACE	0.85	12.13	3.37
	opt-sep-proj	0.79	24.27	3.25
Llama_2_13B	orig	3.84	20.2	2.49
	SAL	0.84	4.81	41.35
	LEACE	0.88	16.32	3.95
	opt-sep-proj	0.81	33.24	3.84
Llama_3_8B_orig	orig	3.98	19.02	2.25
	SAL	0.87	3.5	20.15
	LEACE	0.88	7.68	13.17
	opt-sep-proj	0.82	13.43	12.9
