# Supplementary material
Source: ML conference proceedings conference paper supplement (https://openreview.net/forum?id=t79rMQGk4S)
Supplement: supplementary_material [file full_bert.xlsx]

## Sheet: full_bert
	accuracy		tpr_gap
approach	original	retrained	original	retrained
projection
LEACE	80.05 (1.07)	81.50 (1.14)	11.83 (0.44)	12.84 (0.15)
SAL	77.50 (1.30)	81.40 (1.19)	12.41 (0.70)	13.11 (0.14)
opt-sep-proj	80.16 (1.07)	81.39 (1.06)	11.95 (0.35)	13.08 (0.16)
orig	80.30 (1.08)	81.38 (1.12)	13.73 (0.73)	14.34 (0.32)
	Using the original model		Re-training the last layer
Approach	Accuracy	TPR Gap	Accuracy	TPR Gap
LEACE	80.05 (1.07)	11.83 (0.44)	81.50 (1.14)	12.84 (0.15)
SAL	77.50 (1.30)	12.41 (0.70)	81.40 (1.19)	13.11 (0.14)
Ours	80.16 (1.07)	11.95 (0.35)	81.39 (1.06)	13.08 (0.16)
ERM	80.30 (1.08)	13.73 (0.73)	81.38 (1.12)	14.34 (0.32)

## Sheet: Sheet1
				English	German	French	p(y=a | z=a)	n
			y=1 (toxic)	4500	250	250	0.9	5000
			y=0 (not toxic)	500	2250	2250
