# Supplementary material
Source: ML conference proceedings conference paper supplement (https://openreview.net/forum?id=t79rMQGk4S)
Supplement: supplementary_material [file full_LLM.xlsx]

## Sheet: App
DAMA
Model	Coefficient	Layer	Original	SAL	LEACE	Ours
Llama 2 7B	\beta_{\stereo}	Last	3.594	0.801	0.85	0.791
		Last 3		0.926	0.84	0.761
		Last 5		0.844	0.837	0.773
		Last 9		0.912	0.791	0.678
	\beta_{\fact}	Last	15.712	5.905	12.139	24.294
		Last 3		3.079	12.856	37.084
		Last 5		6.089	11.597	10.537
		Last 9		3.894	27.631	113.038
Model	Accuracy Type	Layer	Original	SAL	LEACE	Ours
Llama 2 7B	Anti-stereotypical	Last	35.35	36.111	35.101	40.657
		Last 3		36.616	35.101	35.859
		Last 5		34.848	36.111	32.323
		Last 9		34.343	37.626	5.303
	Pro-stereotypical	Last	78.28	77.525	78.535	75
		Last 3		77.02	79.293	67.929
		Last 5		75.505	79.04	62.879
		Last 9		72.222	77.525	11.616
	All	Last	56.818	56.818	56.818	57.828
		Last 3		56.818	57.197	51.894
		Last 5		55.177	57.576	47.601
		Last 9		53.283	57.576	8.46

## Sheet: Paper
Winobias
Model	Projection	Anti-stereotypical Acc.	Pro-stereotypical Acc.	Overall Acc.
Llama 2 7B	Original	35.35	78.28	56.82
	SAL	36.11	77.53	56.82
	LEACE	35.1	78.54	56.82
	Ours	40.66	75	57.83
DAMA
Model	Projection	\beta_{\stereo}	\beta_{\fact}
Llama 2 7B	Original	3.594	15.712
	SAL	0.801	5.905
	LEACE	0.85	12.139
	Ours	0.791	24.294
