# Supplementary material
Source: ML conference proceedings conference paper supplement (https://openreview.net/forum?id=t79rMQGk4S)
Supplement: supplementary_material [file llama_2_7b_layers_comparison.xlsx]

## Sheet: Sheet1
layer	method	stereotype_coef	fact_coef
last_3	orig	3.59	15.71
	SAL	1.14	4.07
	LEACE	1.04	14.3
	opt-sep-proj	1	37.94
last_5	orig	3.59	15.71
	SAL	0.86	5.29
	LEACE	0.63	14.35
	opt-sep-proj	0.64	15.09
last_9	orig	3.59	15.71
	SAL	1.18	6.48
	LEACE	0.9	26.12
	opt-sep-proj	0.87	78.17
