# Supplementary material
Source: ML conference proceedings conference paper supplement (https://openreview.net/forum?id=t79rMQGk4S)
Supplement: supplementary_material [file winobias_llama_2_7b_layers_comparison.xlsx]

## Sheet: Sheet1
layer	method	avg_acc_anti_stereotype	avg_acc_stereotype	avg_accuracy
lm_head	orig	36.1	78.8	57.4
	SAL	36.6	77.5	57.1
	LEACE	35.6	78.8	57.2
	opt-sep-proj	41.2	75	58.1
last_3	orig	35.9	78.5	57.2
	SAL	36.9	76.3	56.6
	LEACE	34.8	79.8	57.3
	opt-sep-proj	37.4	73.7	55.6
last_5	orig	35.9	78.5	57.2
	SAL	39.4	75.3	57.3
	LEACE	35.1	80.1	57.6
	opt-sep-proj	35.9	72.5	54.2
last_9	orig	35.9	78.5	57.2
	SAL	37.1	69.2	53.2
	LEACE	36.9	79.5	58.2
	opt-sep-proj	22	40.7	31.3
