# Supplementary material
Source: ML conference proceedings conference paper supplement (https://openreview.net/forum?id=t79rMQGk4S)
Supplement: supplementary_material [file winobias_model_comparison_appendix.xlsx]

## Sheet: Sheet1
model	method	avg_acc_anti_stereotype	avg_acc_stereotype	avg_accuracy
Llama_2_7B	orig	36.1	78.8	57.4
	SAL	36.6	77.5	57.1
	LEACE	35.6	78.8	57.2
	opt-sep-proj	41.2	75	58.1
Llama_2_13B	orig	39.9	86.4	63.1
	SAL	38.4	86.6	62.5
	LEACE	39.9	85.9	62.9
	opt-sep-proj	46	85.6	65.8
Llama_3_8B_orig	orig	39.6	69.9	54.8
	SAL	42.4	71.2	56.8
	LEACE	39.1	70.5	54.8
	opt-sep-proj	40.4	64.6	52.5
