# Supplementary material
Source: ML conference proceedings conference paper supplement (https://openreview.net/forum?id=t79rMQGk4S)
Supplement: supplementary_material [file winobias_pivot_appendix.xlsx]

## Sheet: Sheet1
model	acc_type	layer	orig	SAL	LEACE	opt-sep-proj
Llama_2_7B	avg_acc_anti_stereotype	lm_head	35.354	36.111	35.101	40.657
Llama_2_7B	avg_acc_anti_stereotype	last_3	35.354	36.616	35.101	35.859
Llama_2_7B	avg_acc_anti_stereotype	last_5	35.354	34.848	36.111	32.323
Llama_2_7B	avg_acc_anti_stereotype	last_9	35.354	34.343	37.626	5.303
Llama_2_7B	avg_acc_stereotype	lm_head	78.283	77.525	78.535	75
Llama_2_7B	avg_acc_stereotype	last_3	78.283	77.02	79.293	67.929
Llama_2_7B	avg_acc_stereotype	last_5	78.283	75.505	79.04	62.879
Llama_2_7B	avg_acc_stereotype	last_9	78.283	72.222	77.525	11.616
Llama_2_7B	avg_accuracy	lm_head	56.818	56.818	56.818	57.828
Llama_2_7B	avg_accuracy	last_3	56.818	56.818	57.197	51.894
Llama_2_7B	avg_accuracy	last_5	56.818	55.177	57.576	47.601
Llama_2_7B	avg_accuracy	last_9	56.818	53.283	57.576	8.46
