# Supplementary material
Source: ML conference proceedings conference paper supplement (https://openreview.net/forum?id=t79rMQGk4S)
Supplement: supplementary_material [file winobias_pivot_appendix_paper.xlsx]

## Sheet: Sheet1
model	method	avg_acc_anti_stereotype	avg_acc_stereotype	avg_accuracy
Llama_2_7B	orig	35.354	78.283	56.818
Llama_2_7B	SAL	36.111	77.525	56.818
Llama_2_7B	LEACE	35.101	78.535	56.818
Llama_2_7B	opt-sep-proj	40.657	75	57.828
