# Supplementary material
Source: ML conference proceedings conference paper supplement (https://openreview.net/forum?id=t79rMQGk4S)
Supplement: supplementary_material [file winobias_pivot_Llama_2_7B.xlsx]

## Sheet: Sheet1
model	acc_type	layer	orig	SAL	LEACE	opt-sep-proj
Llama_2_7B	avg_acc_anti_stereotype	lm_head	36.111	36.616	35.606	41.162
Llama_2_7B	avg_acc_anti_stereotype	last_3	35.859	36.869	34.848	37.374
Llama_2_7B	avg_acc_anti_stereotype	last_5	35.859	39.394	35.101	35.859
Llama_2_7B	avg_acc_anti_stereotype	last_9	35.859	37.121	36.869	21.97
Llama_2_7B	avg_acc_stereotype	lm_head	78.788	77.525	78.788	75
Llama_2_7B	avg_acc_stereotype	last_3	78.535	76.263	79.798	73.737
Llama_2_7B	avg_acc_stereotype	last_5	78.535	75.253	80.051	72.475
Llama_2_7B	avg_acc_stereotype	last_9	78.535	69.192	79.545	40.657
Llama_2_7B	avg_accuracy	lm_head	57.449	57.071	57.197	58.081
Llama_2_7B	avg_accuracy	last_3	57.197	56.566	57.323	55.556
Llama_2_7B	avg_accuracy	last_5	57.197	57.323	57.576	54.167
Llama_2_7B	avg_accuracy	last_9	57.197	53.157	58.207	31.313
