# Supplementary material
Source: ML conference proceedings conference paper supplement (https://openreview.net/forum?id=t79rMQGk4S)
Supplement: supplementary_material [file winobias_pivot_Llama_2_13B.xlsx]

## Sheet: Sheet1
model	acc_type	layer	orig	SAL	LEACE	opt-sep-proj
Llama_2_13B	avg_acc_anti_stereotype	lm_head	39.899	38.384	39.899	45.96
Llama_2_13B	avg_acc_stereotype	lm_head	86.364	86.616	85.859	85.606
Llama_2_13B	avg_accuracy	lm_head	63.131	62.5	62.879	65.783
