# Supplementary material
Source: ML conference proceedings conference paper supplement (https://openreview.net/forum?id=t79rMQGk4S)
Supplement: supplementary_material [file winobias_pivot_Llama_3_8B.xlsx]

## Sheet: Sheet1
model	acc_type	layer	orig	SAL	LEACE	opt-sep-proj
Llama_3_8B	avg_acc_anti_stereotype	lm_head	42.677	43.182	43.182	44.444
Llama_3_8B	avg_acc_stereotype	lm_head	82.071	82.576	82.071	80.556
Llama_3_8B	avg_accuracy	lm_head	62.374	62.879	62.626	62.5
